# Supplementary material
Source: PubMed Central journal article supplement (PMC4040366)

# Supplementary Figure 1

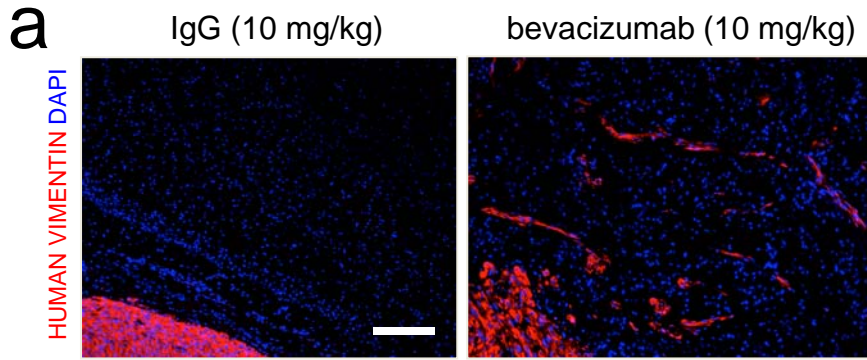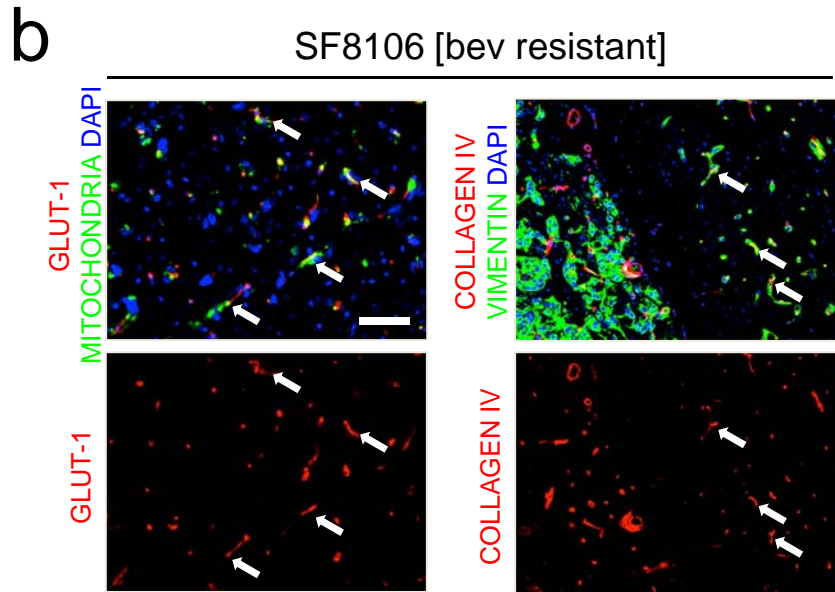

# Supplementary Figure 2

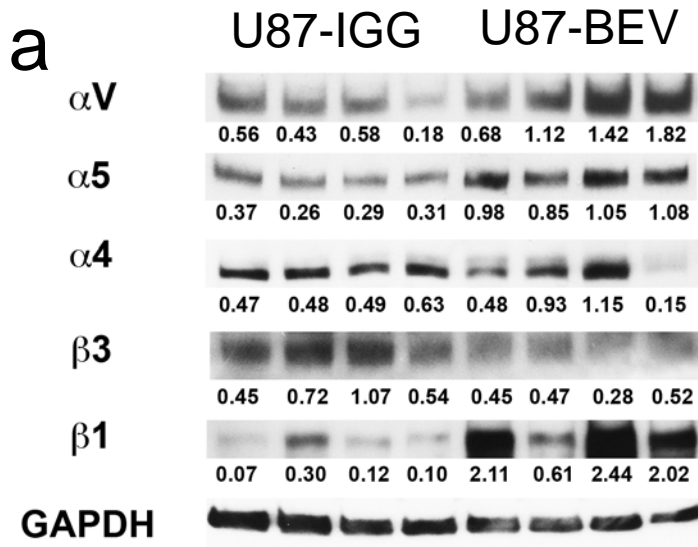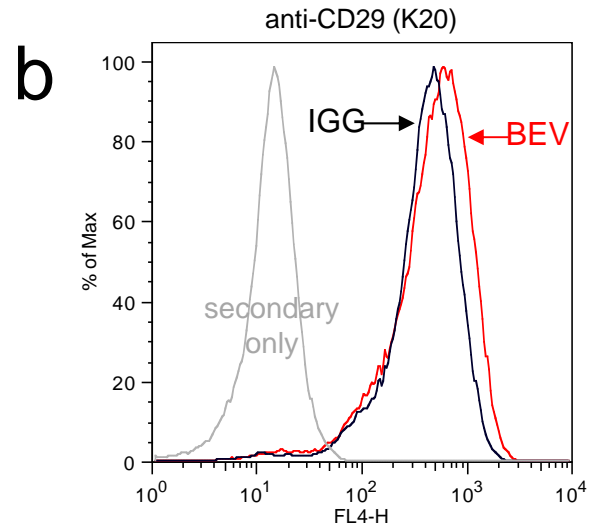

**c** 7996=Bev responsive

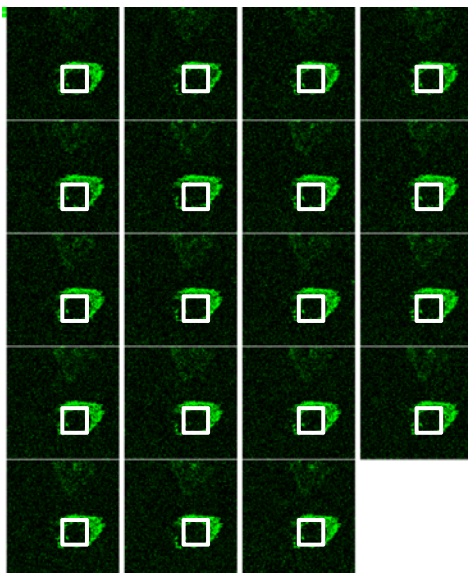

8106=Bev resistant

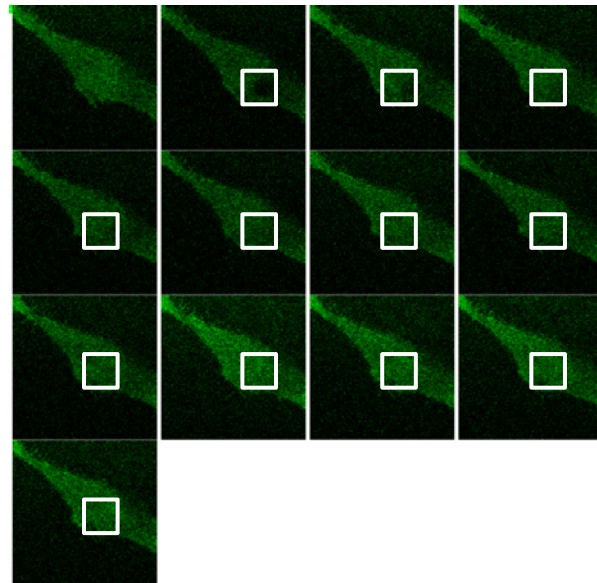

# Supplementary Figure 3

**a**

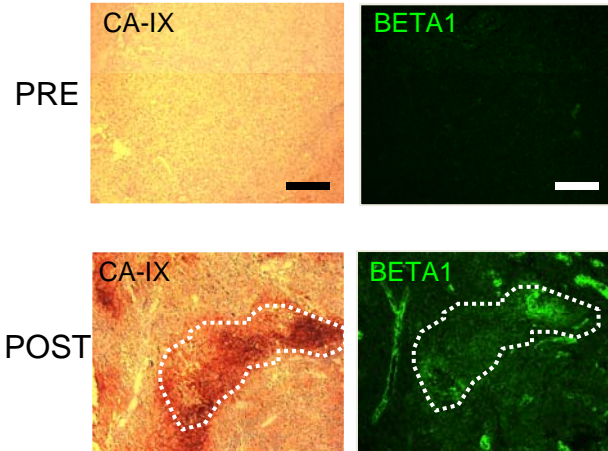

**b**

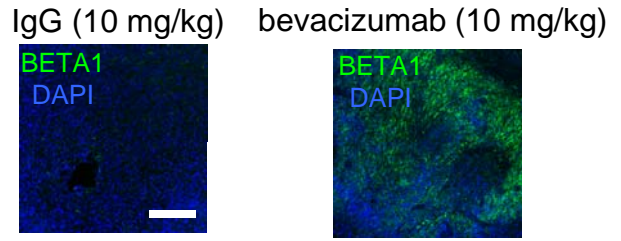

**c**

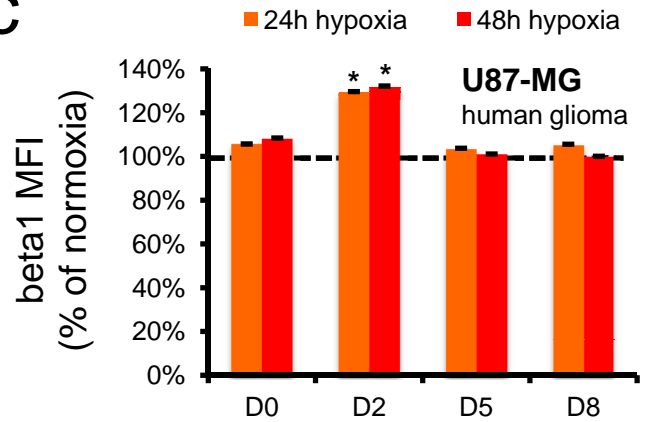

**d**

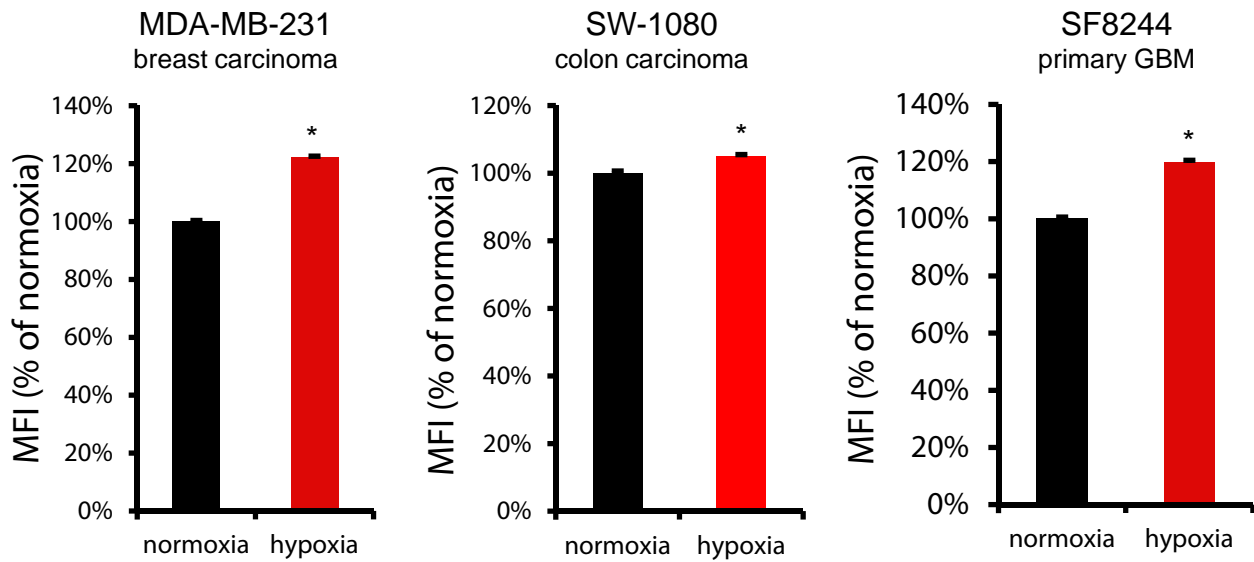

# Supplementary Figure 4

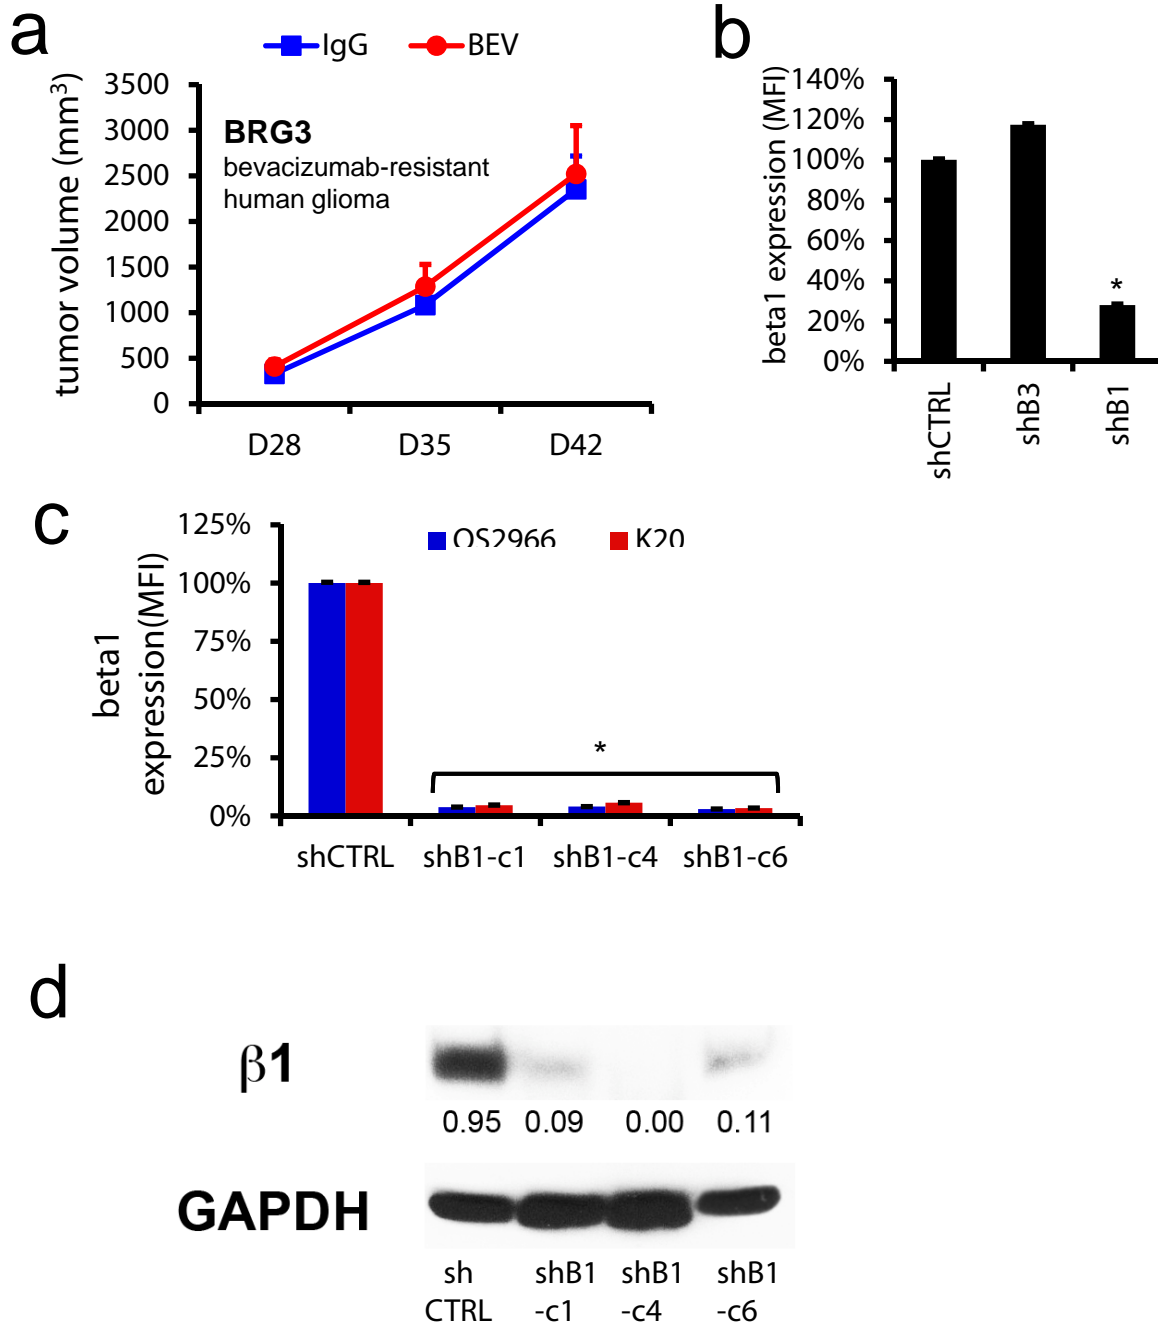

# Supplementary Figure 5

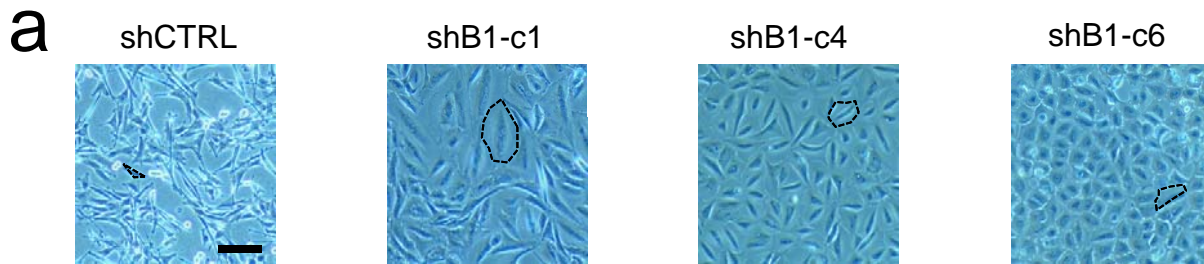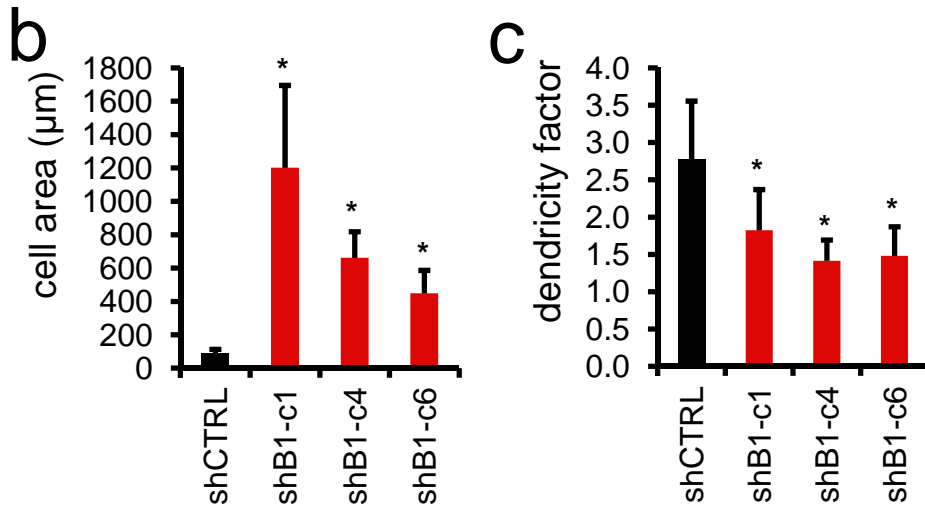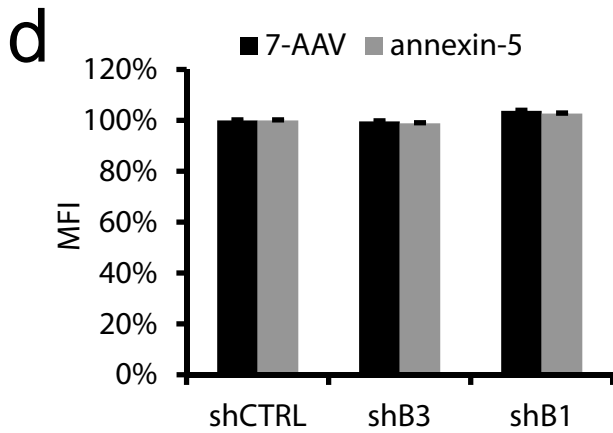

# Supplementary Figure 6

**a**

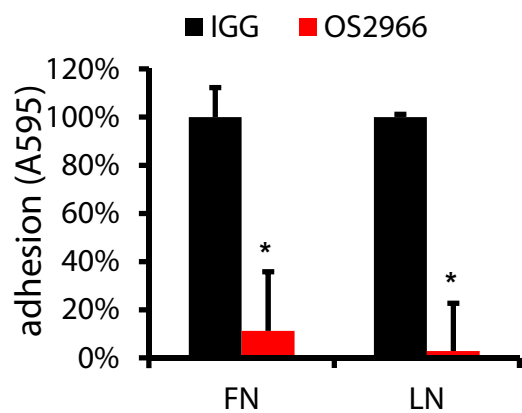

**b**

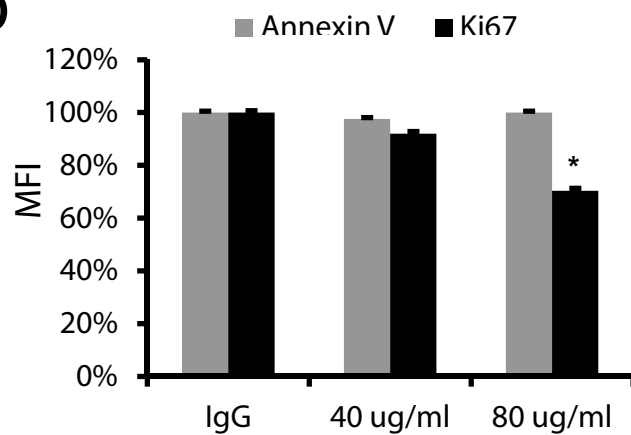

# Supplementary Figure 7

**a**

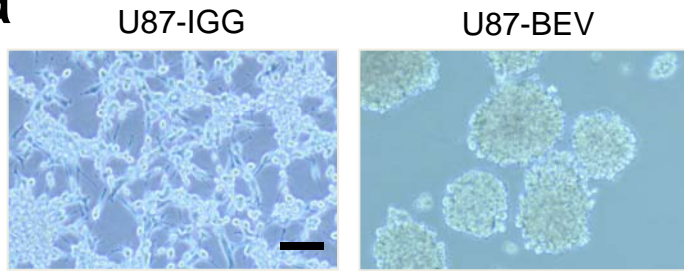

**b**

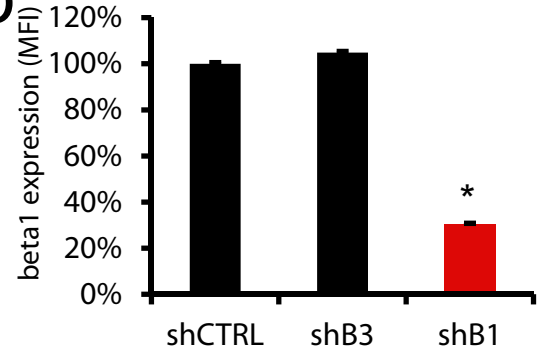

**c**

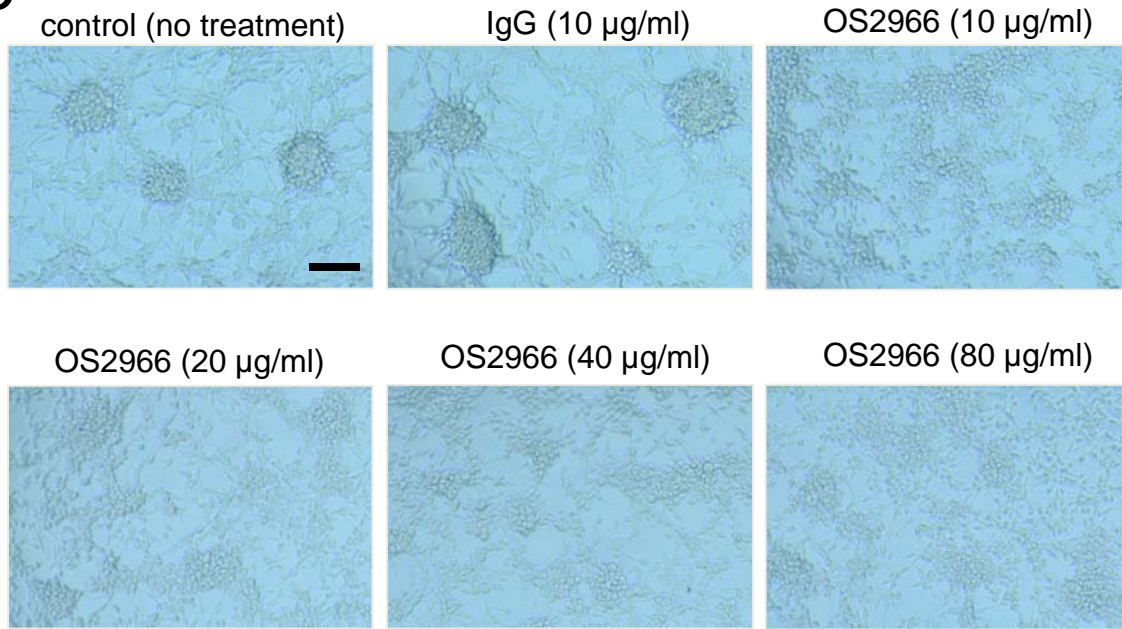



# Supplementary Figure 8

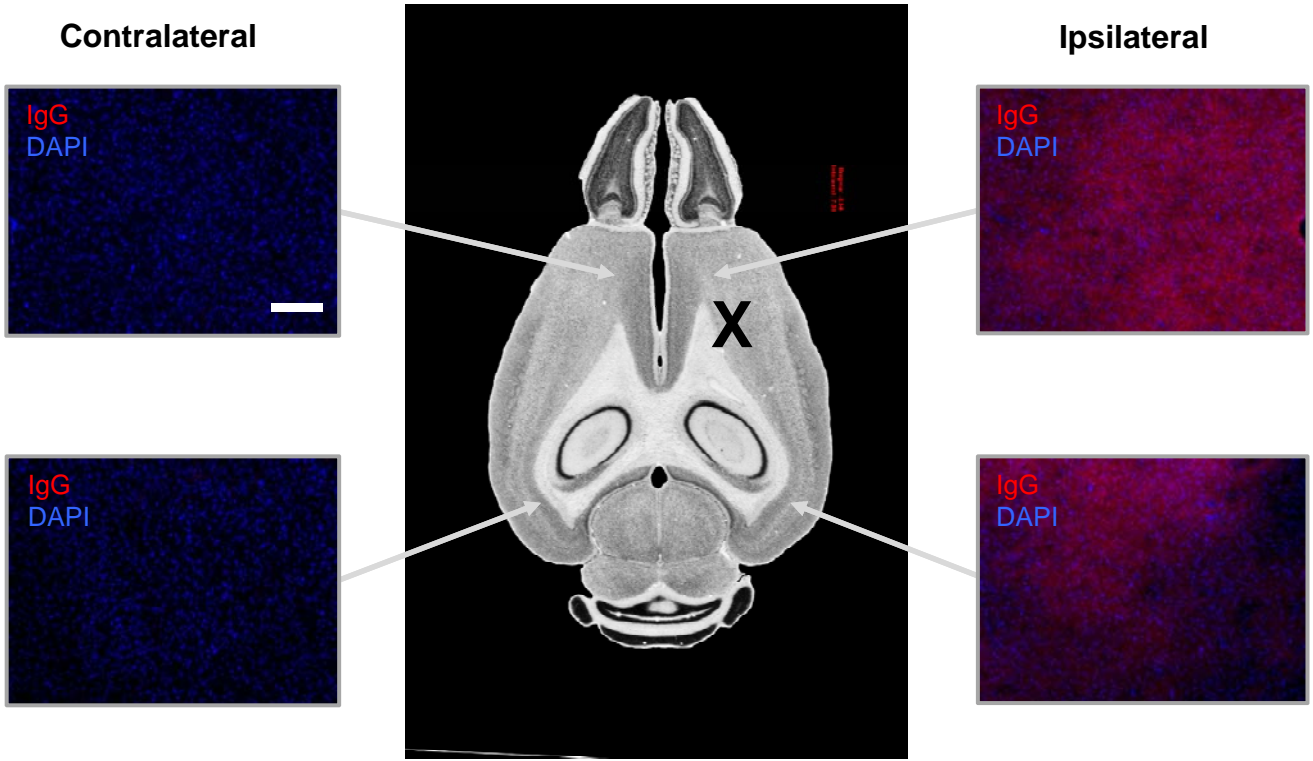

Supplement: NIHMS578938-supplement-Supplementary_figures.pdf [file NIHMS578938-supplement-Supplementary_figures.pdf]
